# Supplementary material for: Ecosystem guidance for the incorporation of renewable utilities in a multi-use campus network
Source: PLoS One. 2022 May 19;17(5):e0267431. doi: 10.1371/journal.pone.0267431 (PMC9119446; doi:10.1371/journal.pone.0267431)
Supplement: S3 Table — (XLSX) [file pone.0267431.s003.xlsx]

## Sheet: S3 Table
	Domestic Cold Water Network
Food Web Matrix from row to column																exports	dissipation/environment
			Utility Plants	Academic	Administrative/Student Services	Dining Hall	Event Venue	Garage	Greenhouse	Health Center	Multipurpose	Museum	Residential	Sports	TV and Radio Station
		0	1	2	3	4	5	6	7	8	9	10	11	12	13	14	15
0	import (from outside the system boundary to the companies)	0	16986724	0	0	0	0	0	0	0	0	0	0	0	0	0	0
1	Utility Plants	0	0	5526865	871090	775239	26427	9143	27725	28816	1369522	14401	7075009	1258966	3521	0	0
2	Academic	0	0	0	0	0	0	0	0	0	0	0	0	0	0	5526865	0
3	Administrative/Student Services	0	0	0	0	0	0	0	0	0	0	0	0	0	0	871090	0
4	Dining Hall	0	0	0	0	0	0	0	0	0	0	0	0	0	0	775239	0
5	Event Venue	0	0	0	0	0	0	0	0	0	0	0	0	0	0	26427	0
6	Garage	0	0	0	0	0	0	0	0	0	0	0	0	0	0	9143	0
7	Greenhouse	0	0	0	0	0	0	0	0	0	0	0	0	0	0	27725	0
8	Health Center	0	0	0	0	0	0	0	0	0	0	0	0	0	0	28816	0
9	Multipurpose	0	0	0	0	0	0	0	0	0	0	0	0	0	0	1369522	0
10	Museum	0	0	0	0	0	0	0	0	0	0	0	0	0	0	14401	0
11	Residential	0	0	0	0	0	0	0	0	0	0	0	0	0	0	7075009	0
12	Sports	0	0	0	0	0	0	0	0	0	0	0	0	0	0	1258966	0
13	TV and Radio Station	0	0	0	0	0	0	0	0	0	0	0	0	0	0	3521	0
14		0	0	0	0	0	0	0	0	0	0	0	0	0	0	0	0
15		0	0	0	0	0	0	0	0	0	0	0	0	0	0	0	0
